# Supplementary material for: Structural characterization of phosphoethanolamine-modified lipid A from probiotic Escherichia coli strain Nissle 1917
Source: Royal Society of Chemistry journal article supplement (doi:10.1039/c9ra02375e), 2019-01-01
Supplement: c9ra02375e1.pdf [file c9ra02375e1.pdf]

## Supplemental Information

### Structural characterization of phosphoethanolamine-modified lipid

#### A from probiotic *Escherichia coli* strain Nissle 1917

Sung-Hyun Jo<sup>a,‡</sup>, Han-Gyu Park<sup>a,‡</sup>, Won-Suk Song<sup>b</sup>, Seong-Min Kim<sup>a</sup>, Eun-Jung Kim<sup>c</sup>, Yung-Hun Yang<sup>d</sup>, Jae-Seok Kim<sup>e</sup>, Byung-Gee Kim<sup>b</sup> and Yun-Gon Kim<sup>a,\*</sup>

<sup>a</sup>Department of Chemical Engineering, Soongsil University, Seoul 06978, Korea

<sup>b</sup>School of Chemical and Biological Engineering, Seoul National University, Seoul 08826, Korea

<sup>c</sup>Institute of Molecular Biology and Genetics, Seoul National University, Seoul 08826, Korea

<sup>d</sup>Department of Biological Engineering, Konkuk University, Seoul 05029, Korea

<sup>e</sup>Department of Laboratory Medicine, Kangdong Sacred Heart Hospital, Hallym University College of Medicine, Seoul 05355, Korea

\*Corresponding author contact information:

Yun-Gon Kim, Prof.

Department of Chemical Engineering, Soongsil University

369 Sangdo-Ro, Seoul, Korea

E-mail: [ygkim@ssu.ac.kr](mailto:ygkim@ssu.ac.kr)

Phone: +82-2-828-7099

‡These authors contributed equally to this work.

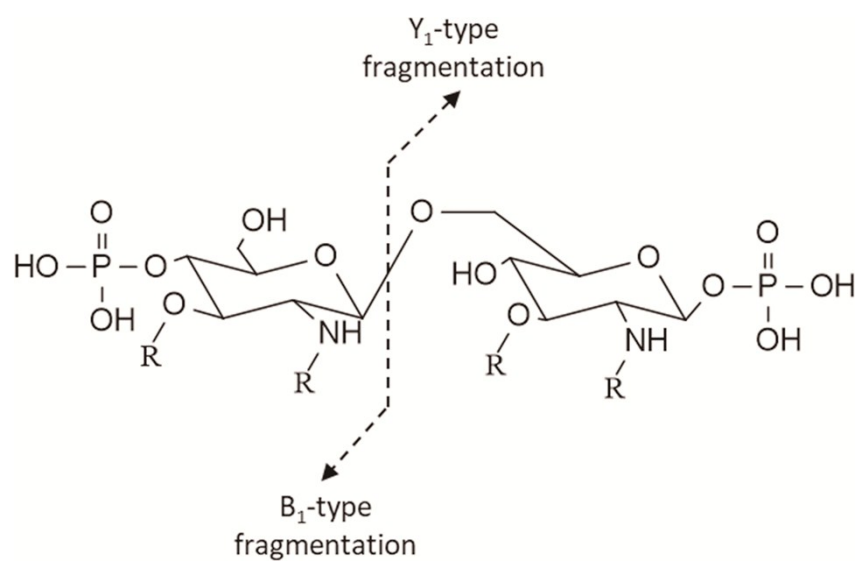

**Supplementary Figure 1.** Inter-ring fragmentation pattern.

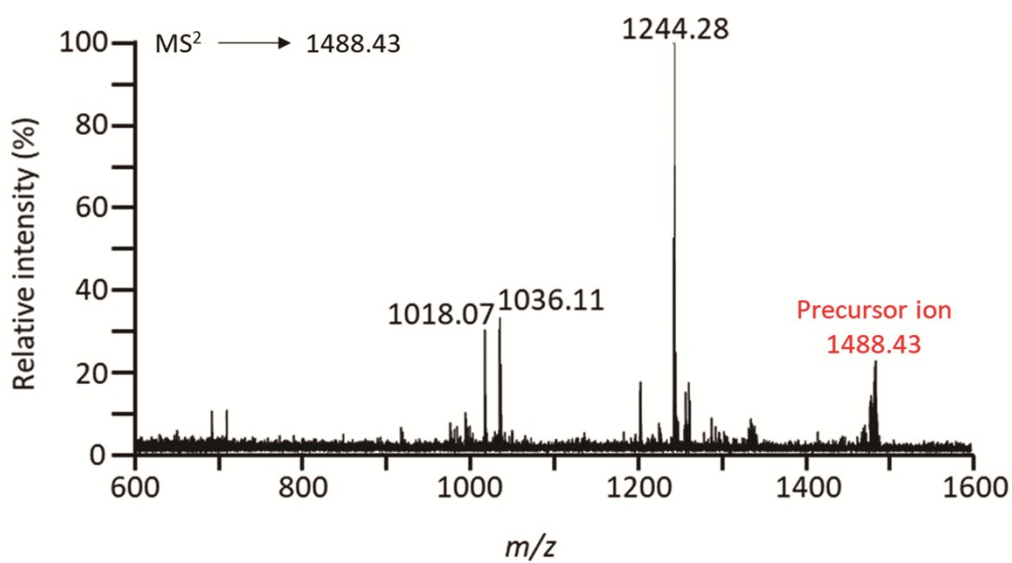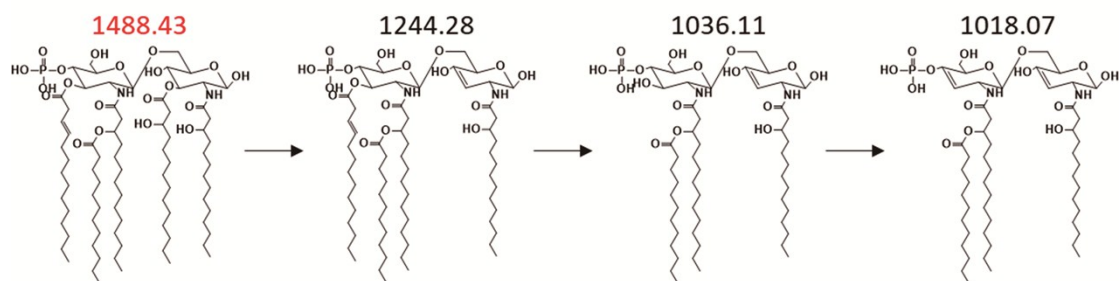

**Supplementary Figure 2.** Negative-ion MALDI-QIT TOF MS<sup>2</sup> spectrum of parent peak at m/z 1488.43 and fragment structures. Precursor ion was indicated by the mass to charge ratio of the red letter.

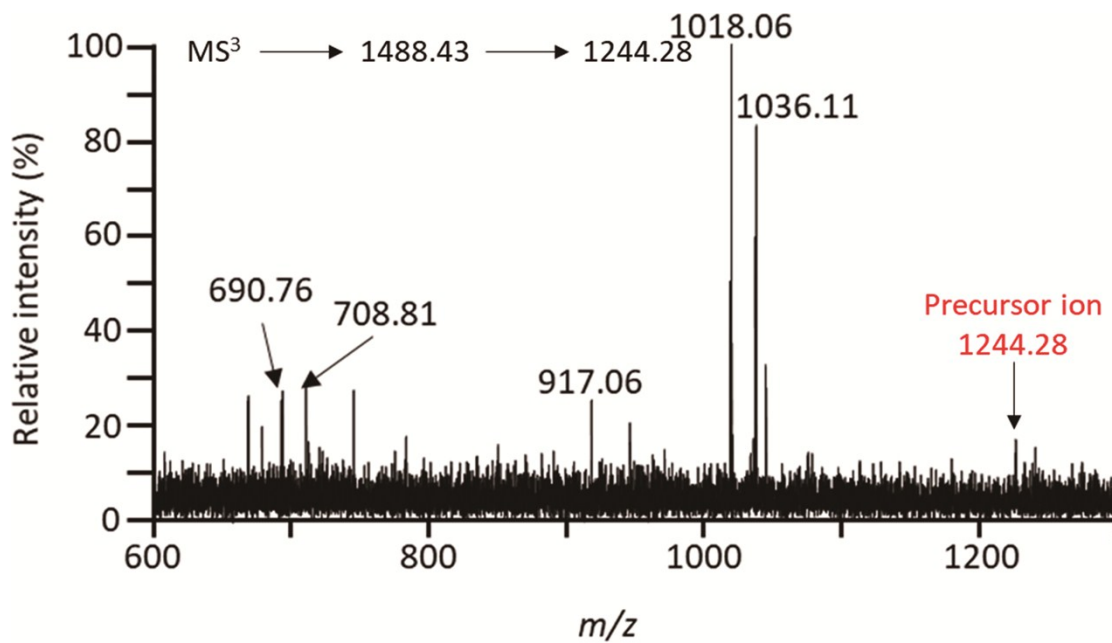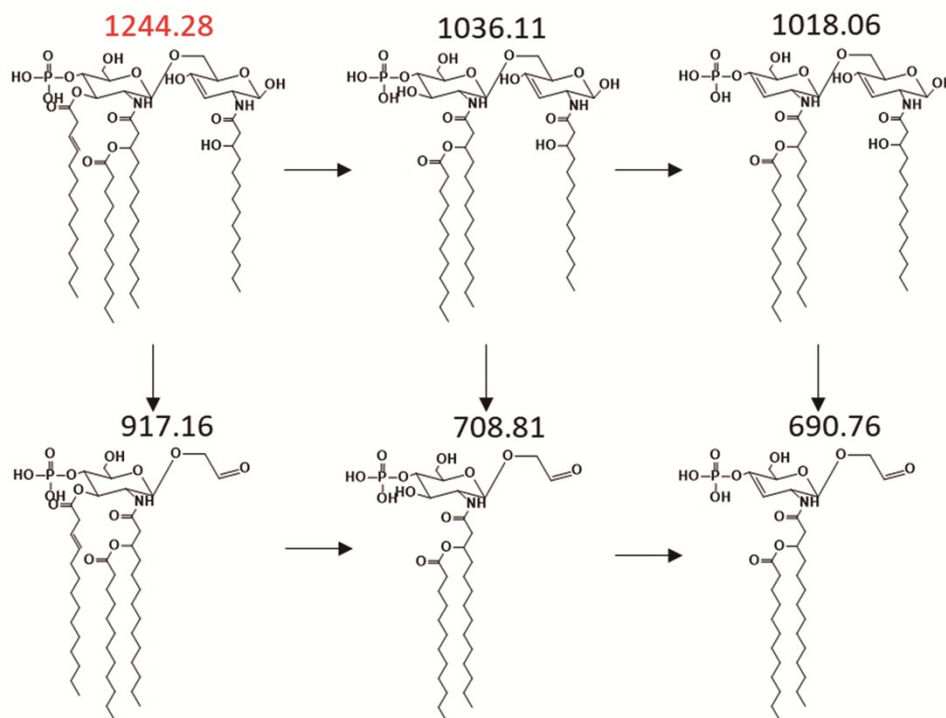

**Supplementary Figure 3.** Negative-ion MALDI-QIT TOF MS<sup>3</sup> spectrum of parent peak at m/z 1244.28 and fragment structures. Precursor ion was indicated by the mass to charge ratio of the red letter.

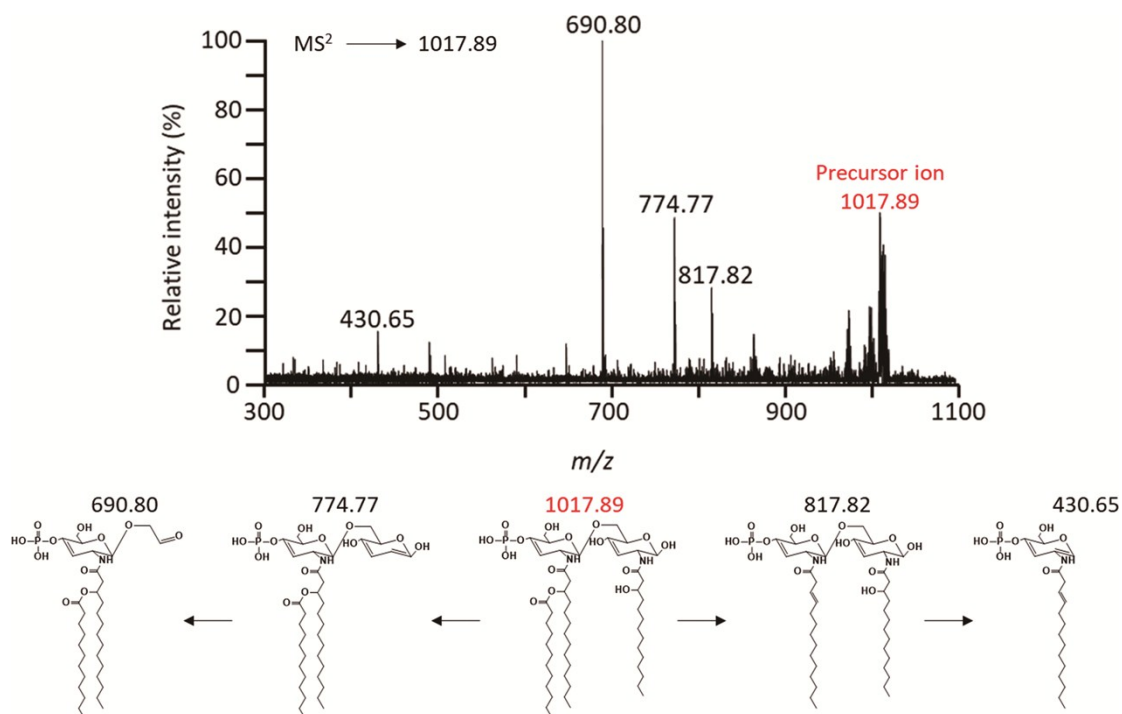

**Supplementary Figure 4.** Negative-ion MALDI-QIT TOF MS<sup>2</sup> spectrum of parent peak at m/z 1017.89 and fragment structures. Precursor ion was indicated by the mass to charge ratio of the red letter.
